# Supplementary material for: Comparative analysis of fecal microbiota of central and eastern black-necked cranes (Grus nigricollis) wintering in Yunnan Province, China
Source: PeerJ journal article supplement (doi:10.7717/peerj.19520), 2025-05-27
Supplement: TableS1.xlsx [file TableS1.xlsx]

## Sheet: phylum
Phylum	Average relative abundance（％）
	DSB	NPH
Firmicutes	76.57±13.14	68.29±29.59
Proteobacteria	14.63±8.38	15.2±18.21
Actinobacteriota	0.92±1.18	14.69±19.98
Fusobacteriota	2.33±8.93	3.17±9.14
Campilobacterota	3.22±4.74	0.36±1.27
Cyanobacteria	0.01±0.02	3.03±7.35
Bacteroidota	1.09±1.6	1.14±2.08
(Unassigned)	0.59±1.83	0.42±0.45
Verrucomicrobiota	0.14±0.2	0.53±0.89
Chloroflexi	0.05±0.07	0.59±0.9
Acidobacteriota	0.04±0.05	0.29±0.36
Patescibacteria	0.08±0.15	0.14±0.22
Spirochaetota	0.13±0.25	0±0.01
Gemmatimonadota	0±0.01	0.11±0.31
Synergistota	0.08±0.16	0±0
Planctomycetota	0.02±0.03	0.06±0.1
others	0.07±0.13	0.26±0.37

## Sheet: class
Class	Average relative abundance（％）
	DSB	NPH
Bacilli	69.23±16.92	59.36±29.01
Gammaproteobacteria	13.84±8.44	7.35±12.62
Actinobacteria	0.77±1.17	12.78±19.78
Clostridia	5.83±6.62	7.44±5.45
Alphaproteobacteria	0.79±0.49	7.84±11.02
Fusobacteriia	2.33±8.93	3.17±9.14
Negativicutes	1.26±3.2	3±8.05
Campylobacteria	3.22±4.74	0.36±1.27
Cyanobacteriia	0±0.01	3±7.32
Bacteroidia	1.09±1.6	1.12±2.06
Coriobacteriia	0.13±0.26	1.74±2.94
(Unassigned)	0.88±1.83	0.62±0.65
Verrucomicrobiae	0.05±0.08	0.46±0.86
Anaerolineae	0.02±0.05	0.31±0.48
Chloroflexia	0±0.01	0.21±0.54
Acidobacteriae	0.03±0.04	0.15±0.14
others	0.51±0.81	0.95±1.36

## Sheet: order
Order	Average relative abundance（％）
	DSB	NPH
Lactobacillales	66.98±17.66	55.42±32.27
Micrococcales	0.61±1.06	7.99±19.33
Enterobacterales	4.58±9.07	0.8±1.18
Fusobacteriales	2.33±8.93	3.17±9.14
Burkholderiales	3.1±1.63	1.62±3.15
Xanthomonadales	3.46±1.89	0.72±1.23
Pseudomonadales	2.05±1.38	3.33±12.08
Lachnospirales	2.79±3.5	1.4±1.99
Veillonellales-Selenomonadales	1.23±3.2	3±8.05
Bacillales	0.34±0.61	4.01±9.15
Campylobacterales	3.22±4.74	0.36±1.27
(Unassigned)	1.65±1.82	1.88±2.23
Bifidobacteriales	0.04±0.05	3.67±5.15
Rhizobiales	0.48±0.36	2.81±4.12
Peptostreptococcales-Tissierellales	1.16±2.44	2±3.1
Clostridiales	1.09±2.39	1.96±1.92
others	4.86±4.07	17.43±17.7

## Sheet: family
Family	Average relative abundance（％）
	DSB	NPH
Lactobacillaceae	42.01±24.06	38.08±29.57
Enterococcaceae	23.49±26.09	2.57±5.02
(Unassigned)	3.44±2.6	4.61±3.82
Micrococcaceae	0.44±0.81	6.95±18.86
Fusobacteriaceae	2.33±8.93	3.17±9.14
Enterobacteriaceae	4.13±9.08	0.72±1.1
Streptococcaceae	0.5±1	4.87±12.31
Xanthomonadaceae	3.46±1.89	0.63±1.14
Lachnospiraceae	2.79±3.5	1.39±1.99
Selenomonadaceae	1.21±3.15	2.93±8.07
Moraxellaceae	1.89±1.34	3.25±11.95
Campylobacteraceae	3.14±4.71	0.32±1.27
Bifidobacteriaceae	0.04±0.05	3.67±5.15
Clostridiaceae	1.09±2.39	1.96±1.92
Peptostreptococcaceae	1.11±2.46	1.9±3.12
Planococcaceae	0.13±0.11	2.68±8.18
others	8.8±5.24	24.21±24.37

## Sheet: genus
Genus	Average relative abundance（％）
	DSB	NPH
Lactobacillus	42.01±24.06	34.15±29.57
Enterococcus	23.49±26.09	2.57±5.01
(Unassigned)	8.19±5.64	16.83±17.28
Arthrobacter	0.09±0.16	6.03±17.75
Streptococcus	0.43±1	4.87±12.3
Cetobacterium	1.39±6.09	3.13±9.12
Megamonas	1.2±3.15	2.91±8.04
Stenotrophomonas	3.46±1.89	0.15±0.23
Campylobacter	3.14±4.71	0.32±1.27
Bifidobacterium	0.04±0.05	3.67±5.15
Escherichia-Shigella	2.36±5.26	0.17±0.3
Clostridium_sensu_stricto_1	1.07±2.39	1.67±1.96
Acinetobacter	1.85±1.32	0.58±1.72
Ralstonia	1.68±0.93	0.01±0.03
Turicibacter	0.99±1.58	0.84±0.9
Psychrobacter	0.04±0.1	2.67±10.27
others	8.57±7.11	19.43±15.23
